# Supplementary material for: A draft genome sequence and functional screen reveals the repertoire of type III secreted proteins of Pseudomonas syringae pathovar tabaci 11528
Source: PubMed Central journal article supplement (PMC2745422; doi:10.1186/1471-2164-10-395), 2009-08-24

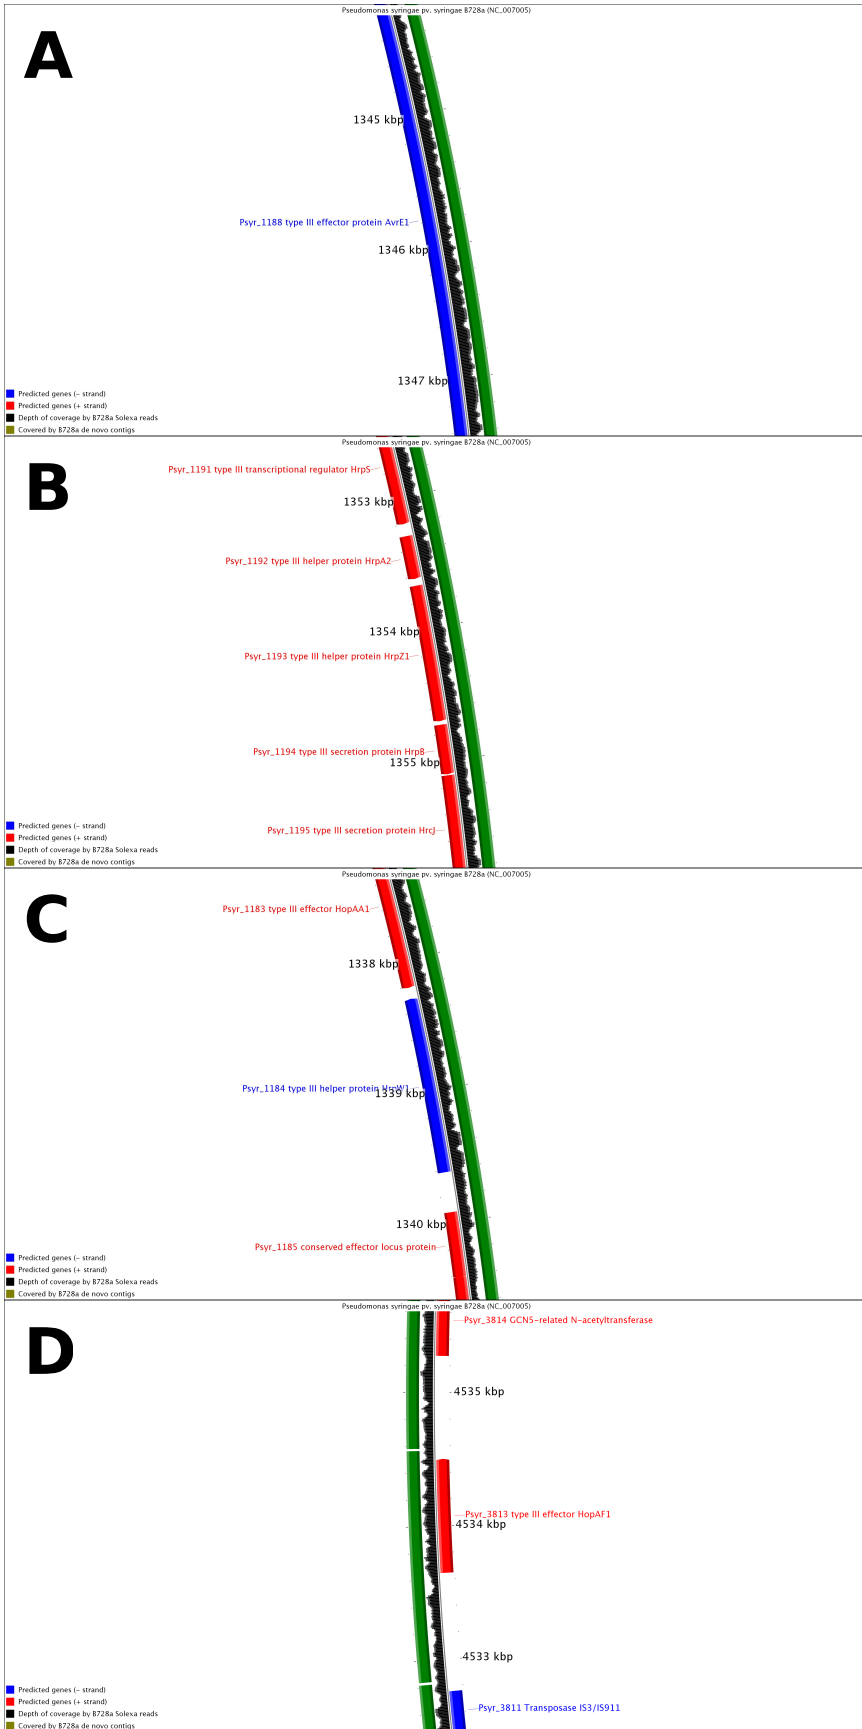

Supplement: 1471-2164-10-395-S4.pdf [file 1471-2164-10-395-S4.pdf]
